# Supplementary material
Source: publisher figshare collection journal article supplement (https://gsapubs.figshare.com/ndownloader/files/22758761)
Supplement: Supplementary file 1 [file 22758761]

## Data Repository 2009065

Walter

### Data Repository Item DR1

| moment[N*m] | ref_lat[deg] | ref_lon[deg] | ref_dep[m]  | length[m]   | width[m]    |
|-------------|--------------|--------------|-------------|-------------|-------------|
| strike[deg] | dip[deg]     | rake[deg]    | dstmax[deg] | ddimax[deg] | dramax[deg] |
| lsubmax[m]  | lsubmin[m]   | xstart[m]    | ystart[m]   | tstart[s]   | v_rup[m/s]  |
| mdis        | dstep[m]     |              |             |             |             |
| 9.1d+17     | 38.44        | 13.78        | 15000.0     | 5000.0      | 2000.0      |
| 251.0       | 53.0         | 112.0        | 5.0         | 5.0         | 10.0        |
| 1500.0      | 100.0        | 1000.0       | 1000.0      | 0.0         | 2000.0      |
| 0           | 500.0        |              |             |             |             |

**Table DR1. Summary of** model parameters used in the semi-analytical code "qscmp06" to calculate synthetic seismograms by (Wang, 1999). Computer code is available by request from the coauthor Wang.

**Data Repository Item DR2.** The Palermo earthquake occurred on 6/9/2002 with a magnitude 6.0 north of Sicily and was followed by a sequence of aftershocks and volcanic activity.

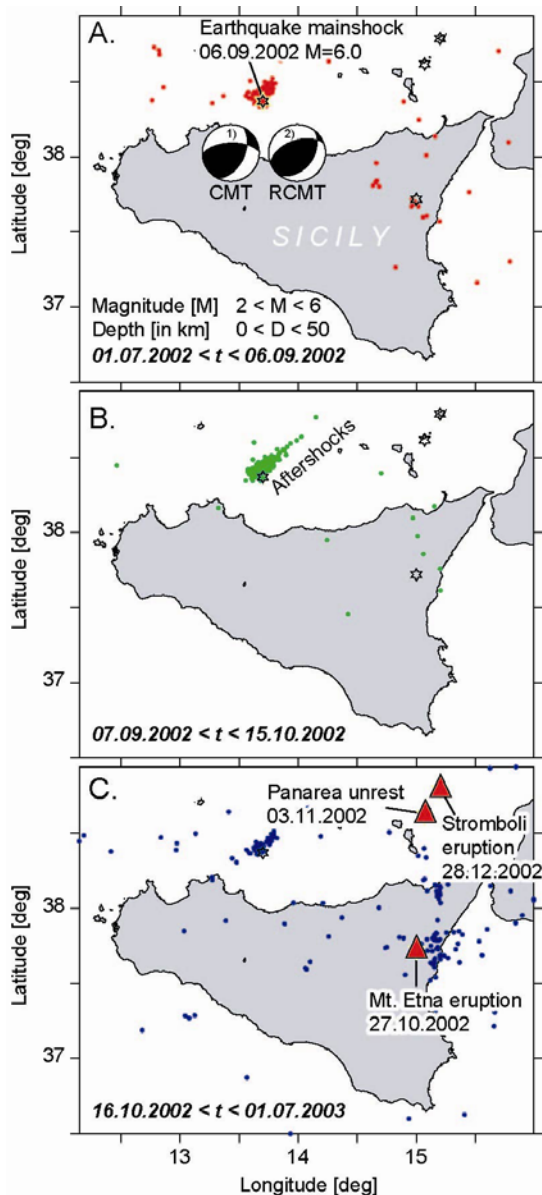

**Figure DR1.** Sequence of seismicity. A. Mainshock with focal mechanism solutions as provided by CMT and RCMT. Seismicity between 1.07.2002 and 06.09.2002. B. Aftershocks indicate rupture plane striking SW-NE, between 07.09.2002 and 15.10.2002. C. Seismicity between 16.10.2002 and 01.07.2003 shows events near Mt. Etna and along the Malta escarpment striking between the Aeolian Islands and Mt. Etna. A general plate tectonic reorganization is not evident in seismicity prior to volcanic eruptions.

**Data Repository Item DR3.** Earthquake mainshock waveform as recorded at the considered locations.

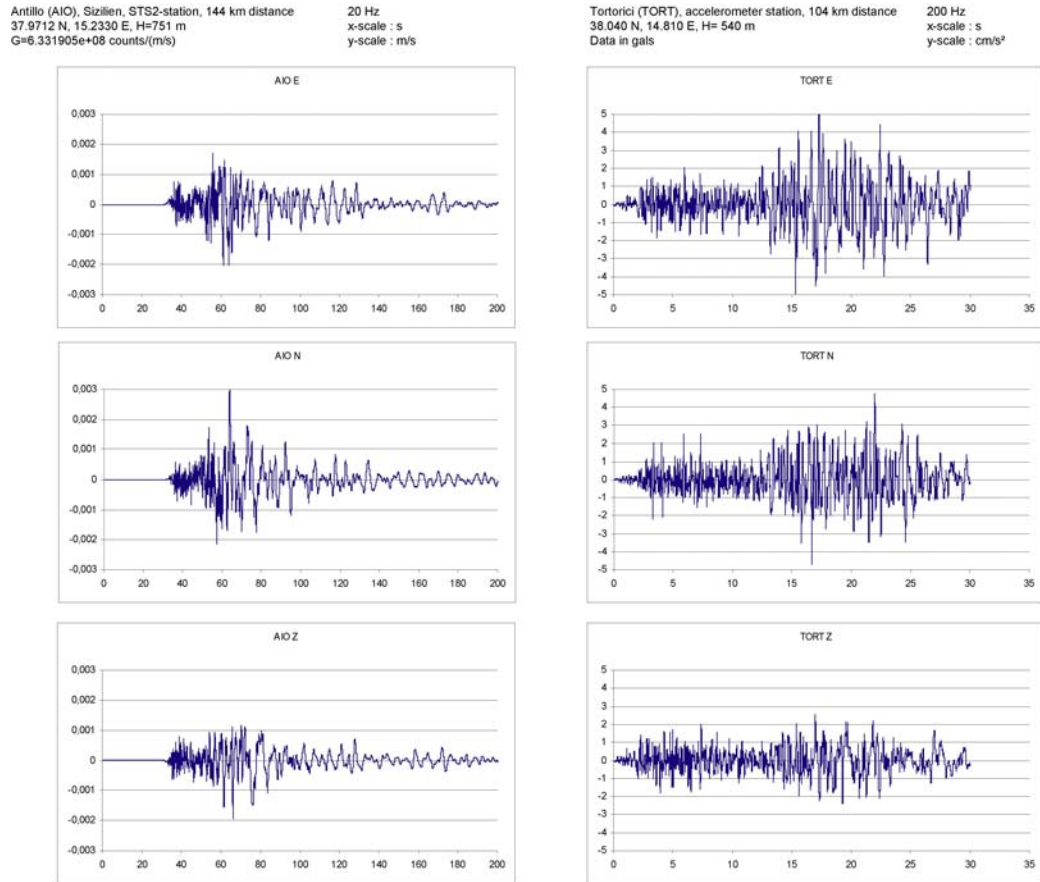

**Figure DR2a.** Three components of the mainshock were directly recorded near the small Sicilian towns Tortorici (TORT) and Antillo (AIO). Station TORT is an accelerometer station, located at 38.040°N 14.810°E, H= 540 m. Station AIO is part of the MedNet network, located at 37.9712°N 15.2330°E, H=751 m, with G=6.331905e+08 counts (m/s).

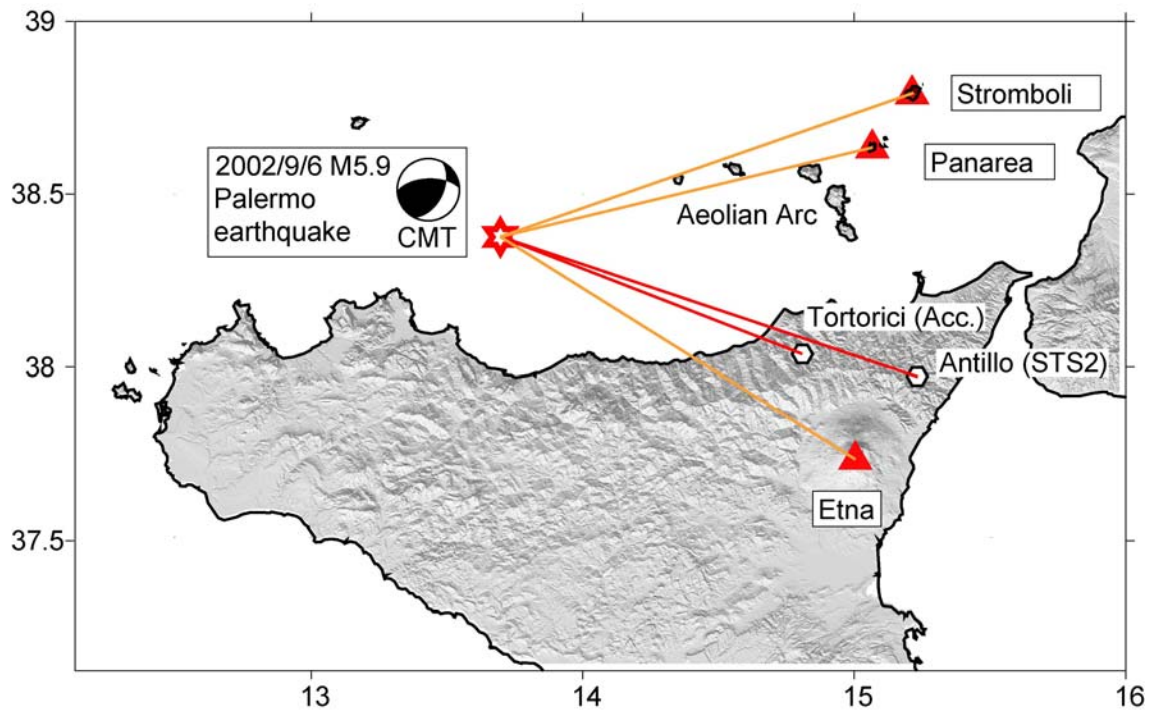

**Figure DR2b.** Upon production of the synthetic seismograms, synthetic pressure variograms were simulated at volcano locations: (a) Mt. Etna, summit elev: 3350 m, latitude: 37.734°N, longitude: 15.004°E, (b) Panarea, summit elev: 421 m, latitude: 38.63°N, longitude: 15.07°E, and (c) Stromboli, summit elev: 924 m, latitude: 38.789°N, longitude: 15.213°E.
